# Supplementary material for: Dogs' Expectation about Signalers' Body Size by Virtue of Their Growls
Source: PLoS One. 2010 Dec 15;5(12):e15175. doi: 10.1371/journal.pone.0015175 (PMC3002277; doi:10.1371/journal.pone.0015175)
Supplement: Table S1 — Data of the subjects, specifications of the growl samples and the experimental arrangement. (XLSX) [file pone.0015175.s003.xlsx]

## Sheet: Sheet1
group	name of subject	Breed of subject	sex of subject	growl ID	sex of the growling dog	size of the subject	Size category of the growling dog	Size of the growling dog in cm	Size of the modified picture in cm	Sizing the modified micture	side of the modified picture
Dog-Noise	Toffee	Golden retriever	female	4	female	Large	Small	50	35	Smaller	Left
	Guiness	Border Collie	female	1	female	Small	Small	44	30.8	Smaller	Left
	Yukie	Labrador retriever	male	9	female	Large	Small	52	36.4	Smaller	Left
	Candy	Labrador retriever	female	10	female	Large	Large	60	42	Smaller	Right
	Luna	Border Collie	female	5	male	Small	Large	63	44.1	Smaller	Right
	Ida	German shepherd	female	11	male	Large	Large	61	42.7	Smaller	Right
	Yogibare	Yorkshire terrier	male	2	male	Small	Small	45	31.5	Smaller	Right
	Penelope	Labrador retriever	female	3	female	Large	Small	32	22.4	Smaller	Right
	Lisa	Golden retriever	female	8	male	Large	Small	40	28	Smaller	Right
	Tiny	Foxterrier	male	6	female	Small	Large	64	44.8	Smaller	Left
	Naib	Österreicher pintscher	male	7	male	Small	Large	64	44.8	Smaller	Left
	Feder	Border Collie	female	12	male	Large	Large	60	42	Smaller	Left
	Tinkerbell	Zwergpintscher	female	10	male	Small	Large	60	78	Bigger	Right
	Jacks	Mongrel	male	5	male	Small	Large	63	81.9	Bigger	Right
	Lucky	Mongrel	male	11	male	Small	Large	61	79.3	Bigger	Right
	Flamme	Mongrel	female	2	female	Large	Small	45	58.5	Bigger	Left
	Lilly	Zwergpintscher	female	3	female	Small	Small	32	41.6	Bigger	Left
	Cini	Zwergpintscher	female	8	male	Small	Small	40	52	Bigger	Left
	Minnie	Chinese crestdog	female	4	female	Small	Small	50	65	Bigger	Right
	Palmira	Mongrel	female	1	female	Small	Small	44	57.2	Bigger	Right
	Finn2	Border Collie	male	9	female	Large	Small	52	67.6	Bigger	Right
	Edgar	Foxterrier	male	6	female	Small	Large	64	83.2	Bigger	Left
	Akina	Akita Inu	female	7	male	Large	Large	64	83.2	Bigger	Left
	Pedro	Mongrel	male	12	male	Small	Large	60	78	Bigger	Left
Dog-Growl	Sayon	Australian Shepherd	male	2	female	Large	Small	45	31.5	Smaller	Left
	Tódor	Mongrel	male	4	female	Small	Small	50	35	Smaller	Left
	Achia	Kleiner Münsterländer	female	1	female	Small	Small	44	30.8	Smaller	Left
	Csillag	Kuvasz	female	10	male	Large	Large	60	42	Smaller	Left
	Sissi	Mongrel	female	11	male	Small	Large	61	42.7	Smaller	Left
	Amira	Rhodesian Ridgeback	female	5	male	Large	Large	63	44.1	Smaller	Left
	Happy	Zwergpintscher	female	9	female	Small	Small	52	36.4	Smaller	Right
	Lucy3	Border Collie	female	3	female	Small	Small	32	22.4	Smaller	Right
	Lestat	German shepherd	male	8	male	Large	Small	40	28	Smaller	Right
	Benji	White Swiss Shepherd Dog	male	6	female	Large	Large	64	44.8	Smaller	Right
	Nash	Siberian huskey	male	7	male	Large	Large	64	44.8	Smaller	Right
	Nessy	Mongrel	female	12	male	Small	Large	60	42	Smaller	Right
	Lucy	Mongrel	female	2	female	Large	Small	45	58.5	Bigger	Left
	Ted	Mongrel	male	3	female	Small	Small	32	41.6	Bigger	Left
	Havanna	Beagle	female	8	male	Small	Small	40	52	Bigger	Left
	Benji2	Border Collie	male	6	female	Small	Large	64	83.2	Bigger	Left
	Jayjay	Border Collie	female	7	male	Small	Large	64	83.2	Bigger	Left
	Lucy2	Rotweiler	female	12	male	Large	Large	60	78	Bigger	Left
	Jocó	Hungarian vizsla	male	4	female	Large	Small	50	65	Bigger	Right
	Cash	Australian Shepherd	male	1	female	Large	Small	44	57.2	Bigger	Right
	Hugo	Mongrel	male	9	female	Small	Small	52	67.6	Bigger	Right
	Quent	Golden retriever	male	10	male	Large	Large	60	78	Bigger	Right
	Quentin	Border Collie	male	5	male	Large	Large	63	81.9	Bigger	Right
	Chilly	Jackrussel terrier	male	11	male	Small	Large	61	79.3	Bigger	Right
Shape-Growl	Fipsy	Mongrel	male	2	female	Small	Small	45	31.5	Smaller	Right
	Kimmy	Foxterrier	female	3	female	Small	Small	32	22.4	Smaller	Right
	Bolita	Eurasian	female	8	male	Large	Small	40	28	Smaller	Right
	Crissy	Australian Shepherd	female	6	female	Large	Large	64	44.8	Smaller	Left
	Finn	Australian Shepherd	male	7	male	Large	Large	64	44.8	Smaller	Left
	Bounty	Australian Shepherd	female	12	male	Large	Large	60	42	Smaller	Left
	Bony	Belgian shepherd	female	4	female	Large	Small	50	35	Smaller	Left
	Kendra	Belgian shepherd	female	1	female	Large	Small	44	30.8	Smaller	Left
	Oszkár	Mongrel	male	9	female	Small	Small	52	36.4	Smaller	Left
	Amy	Border Collie	female	10	male	Small	Large	60	42	Smaller	Right
	Elaine	Border Collie	female	5	male	Small	Large	63	44.1	Smaller	Right
	Diana	White Swiss Shepherd Dog	female	11	male	Large	Large	61	42.7	Smaller	Right
	Idefix	West Highland Terrier	male	2	female	Small	Small	45	58.5	Bigger	Left
	Izzy	Chiuahua	female	3	female	Small	Small	32	41.6	Bigger	Right
	?	Rhodesian Ridgeback	female	8	male	Large	Small	40	52	Bigger	Left
	Shaggy	Mongrel	male	6	female	Small	Large	64	83.2	Bigger	Right
	Beluga	Labrador retriever	female	7	male	Large	Large	64	83.2	Bigger	Left
	Susanne	Mongrel	female	12	male	Large	Large	60	78	Bigger	Right
	Bluebell	Border Collie	female	4	female	Small	Small	50	65	Bigger	Right
	Bobby	French bulldog	male	1	female	Small	Small	44	57.2	Bigger	Left
	Benno	Golden retriever	male	9	female	Large	Small	52	67.6	Bigger	Right
	Nicky	Mongrel	male	10	male	Small	Large	60	78	Bigger	Left
	Kyra	Giant poodle	female	5	male	Large	Large	63	81.9	Bigger	Right
	Lynette	Giant poodle	female	11	male	Large	Large	61	79.3	Bigger	Left
Cat-Growl	Allegro	Border Collie	male	4	female	Large	Small	50	35	Smaller	Right
	Flocke	Border Collie	female	1	female	Small	Small	44	30.8	Smaller	Right
	Benni	Mongrel	male	9	female	Large	Small	52	36.4	Smaller	Right
	Filon	Australian Shepherd	male	2	female	Large	Small	45	31.5	Smaller	Left
	Jimmy	Dalmatiner	male	3	female	Small	Small	32	22.4	Smaller	Left
	Herbie	Mongrel	male	8	male	Large	Small	40	28	Smaller	Left
	Sari	Mongrel	female	4	female	Small	Small	50	35	Smaller	Left
	Ike	Mongrel	male	1	female	Small	Small	44	30.8	Smaller	Left
	Sidney	Border Collie	male	9	female	Large	Small	52	36.4	Smaller	Left
	Sirius	Newfoundlander	male	2	female	Large	Small	45	31.5	Smaller	Right
	Chilly2	Australian Shepherd	female	3	female	Large	Small	32	22.4	Smaller	Right
	Ginger	Mongrel	female	8	male	Large	Small	40	28	Smaller	Right
	Cooper	Mongrel	male	2	female	Large	Small	45	58.5	Bigger	Right
	Foxy	Mongrel	female	3	female	Small	Small	32	41.6	Bigger	Right
	Chico	Shi tzu	male	8	male	Small	Small	40	52	Bigger	Right
	Flyte	Border Collie	male	4	female	Small	Small	50	65	Bigger	Left
	Cooky	Mongrel	female	1	female	Small	Small	44	57.2	Bigger	Left
	Bertl	Australian Shepherd	male	9	female	Large	Small	52	67.6	Bigger	Left
	Kalle	Belgian shepherd	male	2	female	Large	Small	45	58.5	Bigger	Left
	Bandita	Mongrel	male	3	female	Small	Small	32	41.6	Bigger	Left
	Gumó	Mongrel	female	8	female	Small	Small	40	52	Bigger	Left
	Marty	Mongrel	male	4	female	Large	Small	50	65	Bigger	Right
	Xena	Jackrussel terrier	female	1	female	Small	Small	44	57.2	Bigger	Right
	Lottie	Border Collie	female	9	male	Small	Small	52	67.6	Bigger	Right
